# Supplementary material for: Complete chloroplast genomes of medicinally important Teucrium species and comparative analyses with related species from Lamiaceae
Source: PeerJ. 2019 Jul 9;7:e7260. doi: 10.7717/peerj.7260 (PMC6625504; doi:10.7717/peerj.7260)
Supplement: Table S3 [file peerj-07-7260-s003.docx]

**Table S3. Simple sequence repeats (SSRs) in the chloroplast genomeof *Teucrium stocksianum* subsp*. stocksianum*.**

| **Unit** | **Length** | **No** | **SSR start** |
| --- | --- | --- | --- |
| | A | | --- | |  | | 17 | 1 | 77741 |
|  | 12 | 3 | 99938,123817,131811 |
|  | 11 | 22 | 18364, 42355, 43565, 57645, 82208, 111948, 116962, 149542, 4499, 7940, 8186, 27142, 43676, 53121, 68383, 78260, 79450, 81682, 111847, 116877, 121640,122630 |
| C | 11 | 2 | 101154, 130596 |
| AT | 10 | 1 | 45050 |
|  | 9 | 4 | 30326, 53650, 75747, 120080 |
|  | 8 | 8 | 60231, 74022, 74238, 30318, 30335, 41425, 43598, 46708 |
| AG | 8 | 2 | 54335 59316 |
|  | 8 | 6 | 83944 92312 103299 128454 139441 147809 |
| AC | 8 | 1 | 13837 |
| CG | 8 | 1 | 19727 |
| AAAG | 13 | 4 | 4335 4433 69887 79880 |
| ACAG | 12 | 1 | 11088 |
| AAAT | 12 | 3 | 47111 67747 112167 |
| AATC | 12 | 1 | 119837 |
| AAG | 15 | 2 | 107122 124624 |
|  | 11 | 1 | 71589 |
|  | 10 | 1 | 28018 |
| AAT | 10 | 5 | 81813 94045 107074 111868 116453 |
|  | 10 | 3 | 124677 137706 149938 |
|  | 9 | 15 | 2926, 21984, 28706, 36159, 75922, 87896, 89641, 92607, 109428, 120788, 120951, 123277, 139145, 142111, 143856 |
| ATC | 10 | 2 | 37692 53503 |
| AAC | 10 | 1 | 53818 |
|  | 9 | 6 | 8635, 14621, 48733, 65954, 106737, 125015 |
| AGC | 9 | 6 | 39590, 55229, 81176, 101732, 117651, 130020 |
| AGG | 9 | 2 | 56442, 64099 |
| AAGATG | 24 | 2 | 107158, 124579 |
