# Supplementary material for: Complete chloroplast genomes of medicinally important Teucrium species and comparative analyses with related species from Lamiaceae
Source: PeerJ. 2019 Jul 9;7:e7260. doi: 10.7717/peerj.7260 (PMC6625504; doi:10.7717/peerj.7260)
Supplement: Table S6 [file peerj-07-7260-s006.xlsx]

## Sheet: Sheet1
	Table S6	SNP and Indels of Teucrium stocksianum subsp. stenophyllum with related species
			T. mascatense	T. stocksianum	A. reptans	C. mongholica	L. album	L. galeobdolon	S. byzantina
		SNP	5458	6254	10130	14106	19575	18982	24008
		Indels	2275	6085	13291	12991	18241	18201	29438
							T. mascatense= Teucrium mascatense, T. stocksianum= Teucrium stocksianum subsp. stocksianum, T. stenophyllum= Teucrium stocksanium subsp. stenophyllum
